# Supplementary material for: Aldehyde metabolism governs resilience of mucociliary clearance to air pollution exposure
Source: JCI journal article supplement (doi:10.1172/jci191276), 2025-05-15

**Supplemental Figure 2A**

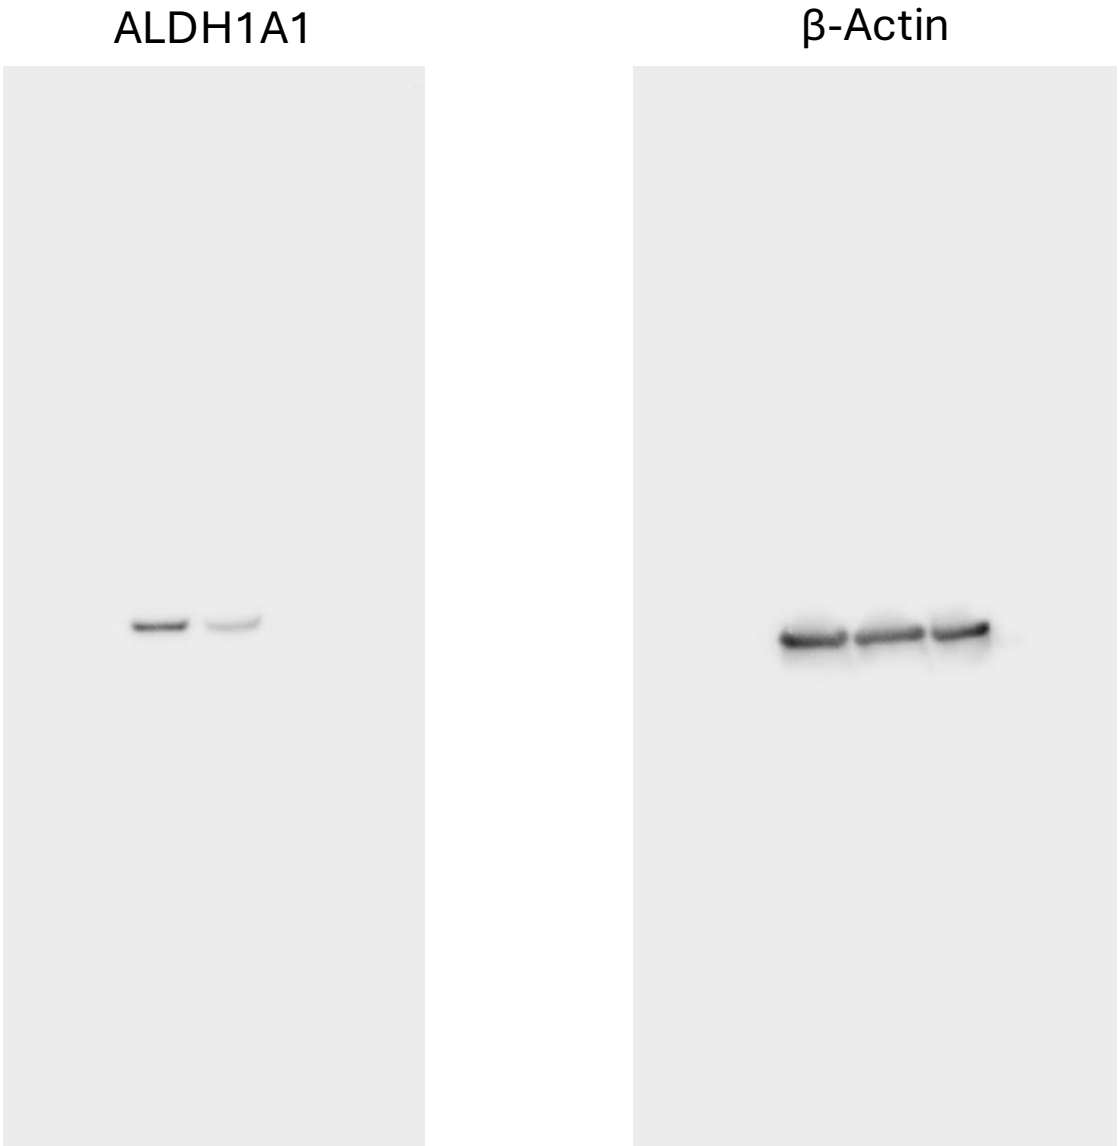

Figure 6D

TUBA

$\beta$ -Actin

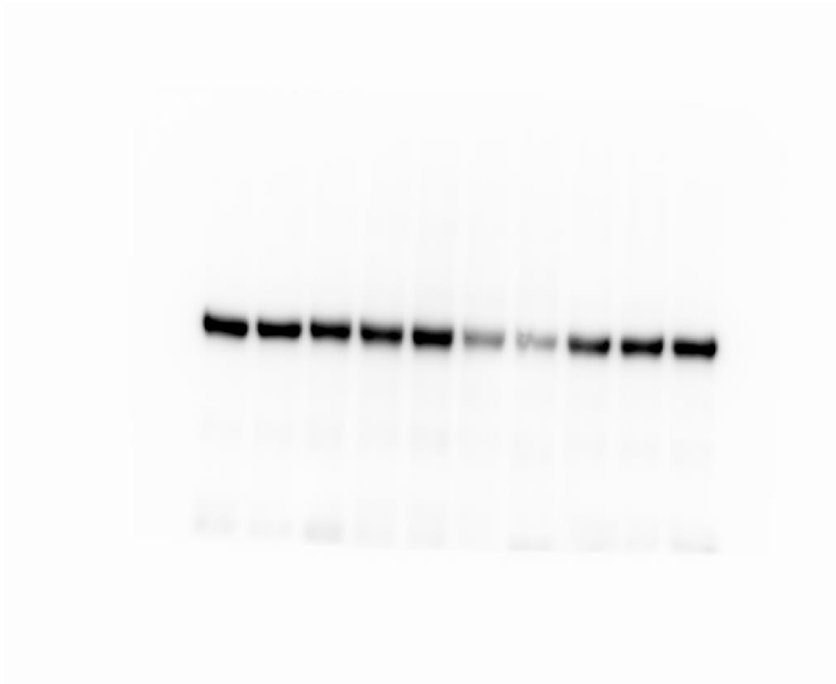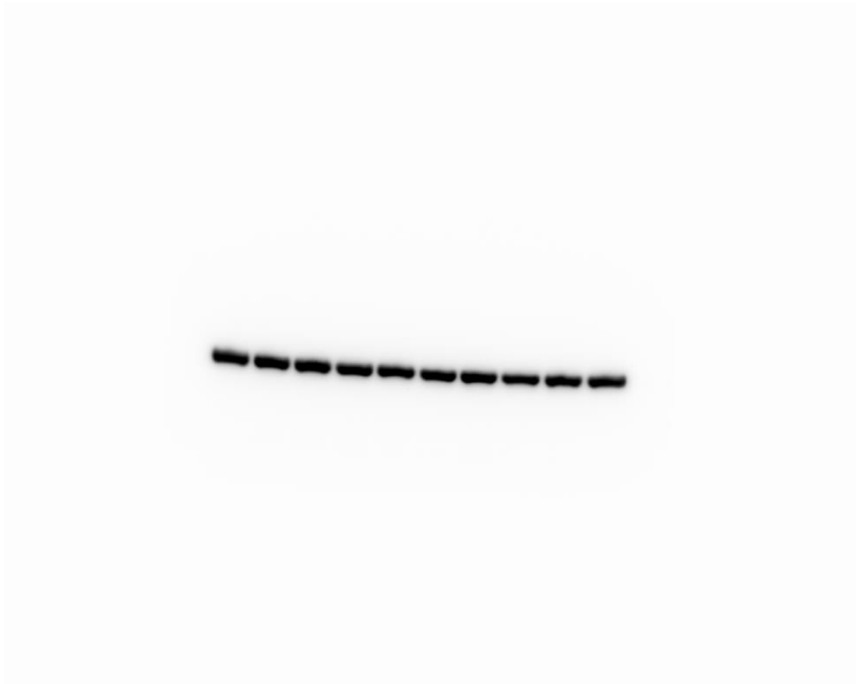

Supplement: sd2 [file 2]
